# Supplementary material
Source: MDPI journal article supplement (https://www.mdpi.com/2313-576X/6/1/1)
Supplement: s1 [file s1]

Search strings used to select documents in Scopus (last access on 27 November 2019).

## 1. Research A.

Scopus - Document search results

275 document results

KEY ("tractor" AND "safety") AND (LIMIT-TO (PUBYEAR, 2019) OR LIMIT-TO (PUBYEAR, 2018) OR LIMIT-TO (PUBYEAR, 2017) OR LIMIT-TO (PUBYEAR, 2016) OR LIMIT-TO (PUBYEAR, 2015) OR LIMIT-TO (PUBYEAR, 2014) OR LIMIT-TO (PUBYEAR, 2013) OR LIMIT-TO (PUBYEAR, 2012) OR LIMIT-TO (PUBYEAR, 2011) OR LIMIT-TO (PUBYEAR, 2010) OR LIMIT-TO (PUBYEAR, 2009))

Refine results

Access type

- Open Access (23)
- Other (252)

Year

- 2019 (32)
- 2018 (32)
- 2017 (20)
- 2016 (29)
- 2015 (19)

Documents

Analyze search results

Show all abstracts Sort on: Date (newest)

| Document title                                                                                                                           | Authors                                                       | Year | Source                                         | Cited by |
|------------------------------------------------------------------------------------------------------------------------------------------|---------------------------------------------------------------|------|------------------------------------------------|----------|
| 1 Accessing and operating agricultural machinery: Advancements in assistive technology for users with impaired mobility                  | Ehlers, S.G., Field, W.E.                                     | 2019 | Assistive Technology 31(5), pp. 251-258        | 0        |
| 2 Comparative Analysis between American and European Requirements for Electronic Stability Control (ESC) Focusing on Commercial Vehicles | Iombriller, S.F., Bolognesi Prado, W., Silva, M.A.            | 2019 | SAE Technical Papers 2019-September(September) | 0        |
| 3 Development of an inexpensive rollover energy dissipation device to improve safety provided by ROPS                                    | Latorre-Biel, J.-I., Ballesteros, T., Arana, I., Alfaro, J.R. | 2019 | Biosystems Engineering 185, pp. 88-102         | 2        |

Scopus - Document search results

109 document results

KEY ("tractor" AND "safety") AND (LIMIT-TO (PUBYEAR, 2019) OR LIMIT-TO (PUBYEAR, 2018) OR LIMIT-TO (PUBYEAR, 2017) OR LIMIT-TO (PUBYEAR, 2016) OR LIMIT-TO (PUBYEAR, 2015) OR LIMIT-TO (PUBYEAR, 2014) OR LIMIT-TO (PUBYEAR, 2013) OR LIMIT-TO (PUBYEAR, 2012) OR LIMIT-TO (PUBYEAR, 2011) OR LIMIT-TO (PUBYEAR, 2010) OR LIMIT-TO (PUBYEAR, 2009)) AND (LIMIT-TO (SUBJAREA, "ENGI")) AND (LIMIT-TO (DOCTYPE, "ar")) AND (LIMIT-TO (LANGUAGE, "English")) AND (EXCLUDE (SRCTYPE, "k"))

Refine results

Access type

- Open Access (7)
- Other (102)

Year

- 2019 (12)
- 2018 (15)
- 2017 (6)
- 2016 (13)
- 2015 (11)
- 2014 (6)
- 2013 (14)
- 2012 (9)

Documents

Analyze search results

Show all abstracts Sort on: Date (newest)

| Document title                                                                                                   | Authors                                                       | Year | Source                                  | Cited by |
|------------------------------------------------------------------------------------------------------------------|---------------------------------------------------------------|------|-----------------------------------------|----------|
| 1 Development of an inexpensive rollover energy dissipation device to improve safety provided by ROPS            | Latorre-Biel, J.-I., Ballesteros, T., Arana, I., Alfaro, J.R. | 2019 | Biosystems Engineering 185, pp. 88-102  | 2        |
| 2 Falling-object protective structure for tractors in service: Prototype design and validation                   | Al-Bassit, L., Tricot, N., Sayegh, S.                         | 2019 | Biosystems Engineering 185, pp. 76-87   | 1        |
| 3 Models to predict the force to operate front foldable rollover protective structures for narrow-track tractors | Franceschetti, B., Rondelli, V.                               | 2019 | Biosystems Engineering 185, pp. 126-134 | 1        |
| 4 Assessment of a ride comfort number for agricultural tractors: A simplified                                    | Cutini, M., Brambilla, M., Bisaglia, C.                       | 2019 | Biosystems Engineering                  | 1        |

Search string: KEY ("tractor" AND "safety") AND (LIMIT-TO (PUBYEAR, 2019) OR LIMIT-TO (PUBYEAR, 2018) OR LIMIT-TO (PUBYEAR, 2017) OR LIMIT-TO (PUBYEAR, 2016) OR LIMIT-TO (PUBYEAR, 2015) OR LIMIT-TO (PUBYEAR, 2014) OR LIMIT-TO (PUBYEAR, 2013) OR LIMIT-TO (PUBYEAR, 2012) OR LIMIT-TO (PUBYEAR, 2011) OR LIMIT-TO (PUBYEAR, 2010) OR LIMIT-TO (PUBYEAR, 2009)) AND (LIMIT-TO (SUBJAREA, "ENGI")) AND (LIMIT-TO (DOCTYPE, "ar")) AND (LIMIT-TO (LANGUAGE, "English")) AND (EXCLUDE (SRCTYPE, "k"))

## 2. Research B.

**230 document results**

KEY ("machine\*" AND "safety" AND "agricultur\*") AND (LIMIT-TO (PUBYEAR, 2019) OR LIMIT-TO (PUBYEAR, 2018) OR LIMIT-TO (PUBYEAR, 2017) OR LIMIT-TO (PUBYEAR, 2016) OR LIMIT-TO (PUBYEAR, 2015) OR LIMIT-TO (PUBYEAR, 2014) OR LIMIT-TO (PUBYEAR, 2013) OR LIMIT-TO (PUBYEAR, 2012) OR LIMIT-TO (PUBYEAR, 2011) OR LIMIT-TO (PUBYEAR, 2010) OR LIMIT-TO (PUBYEAR, 2009))

**53 document results**

KEY ("machine\*" AND "safety" AND "agricultur\*") AND (LIMIT-TO (PUBYEAR, 2019) OR LIMIT-TO (PUBYEAR, 2018) OR LIMIT-TO (PUBYEAR, 2017) OR LIMIT-TO (PUBYEAR, 2016) OR LIMIT-TO (PUBYEAR, 2015) OR LIMIT-TO (PUBYEAR, 2014) OR LIMIT-TO (PUBYEAR, 2013) OR LIMIT-TO (PUBYEAR, 2012) OR LIMIT-TO (PUBYEAR, 2011) OR LIMIT-TO (PUBYEAR, 2010) OR LIMIT-TO (PUBYEAR, 2009)) AND (LIMIT-TO (SUBJAREA, "ENGI")) AND (LIMIT-TO (DOCTYPE, "ar")) AND (LIMIT-TO (LANGUAGE, "English"))

**Document 1 (from 230 results):**

| Document title                                                                                                          | Authors                   | Year | Source                                  | Cited by |
|-------------------------------------------------------------------------------------------------------------------------|---------------------------|------|-----------------------------------------|----------|
| 1 Accessing and operating agricultural machinery: Advancements in assistive technology for users with impaired mobility | Ehlers, S.G., Field, W.E. | 2019 | Assistive Technology 31(5), pp. 251-258 | 0        |

**Document 2 (from 230 results):**

| Document title                                                                                                    | Authors                | Year | Source                                                                        | Cited by |
|-------------------------------------------------------------------------------------------------------------------|------------------------|------|-------------------------------------------------------------------------------|----------|
| 2 Prohibition on changing workplaces and fatal occupational injuries among chinese migrant workers in South Korea | Lee, J.-Y., Cho, S.-I. | 2019 | International Journal of Environmental Research and Public Health 16(18),3333 | 1        |

**Document 3 (from 230 results):**

| Document title                                                                                                                                        | Authors                                            | Year | Source                                     | Cited by |
|-------------------------------------------------------------------------------------------------------------------------------------------------------|----------------------------------------------------|------|--------------------------------------------|----------|
| 3 Fast visualization of distribution of chromium in rice leaves by re-heating dual-pulse laser-induced breakdown spectroscopy and chemometric methods | Peng, J., He, Y., Zhao, Z., (-), Liu, F., Shen, T. | 2019 | Environmental Pollution 252, pp. 1125-1132 | 1        |

**Document 1 (from 53 results):**

| Document title                                                                         | Authors                                 | Year | Source                                | Cited by |
|----------------------------------------------------------------------------------------|-----------------------------------------|------|---------------------------------------|----------|
| 1 Assessment of a ride comfort number for agricultural tractors: A simplified approach | Cutini, M., Brambilla, M., Bisaglia, C. | 2019 | BioSystems Engineering 185, pp. 35-44 | 1        |

**Document 2 (from 53 results):**

| Document title                                                                                                            | Authors                                                         | Year | Source              | Cited by |
|---------------------------------------------------------------------------------------------------------------------------|-----------------------------------------------------------------|------|---------------------|----------|
| 2 Strength analysis of a PTO (Power Take-Off) gear-train of a multi-purpose cultivator during a rotary ditching operation | Kim, Y.-S., Lee, P.-U., Kim, W.-S., (-), Lee, K.-H., Kim, Y.-J. | 2019 | Energies 12(6),1100 | 0        |

Search string: KEY ("machine\*" AND "safety" AND "agricultur\*") AND (LIMIT-TO (PUBYEAR, 2020) OR LIMIT-TO (PUBYEAR, 2019) OR LIMIT-TO (PUBYEAR, 2018) OR LIMIT-TO (PUBYEAR, 2017) OR LIMIT-TO (PUBYEAR, 2016) OR LIMIT-TO (PUBYEAR, 2015) OR LIMIT-TO (PUBYEAR, 2014) OR LIMIT-TO (PUBYEAR, 2013) OR LIMIT-TO (PUBYEAR, 2012) OR LIMIT-TO (PUBYEAR, 2011) OR LIMIT-TO (PUBYEAR, 2010) OR LIMIT-TO (PUBYEAR, 2009)) AND (LIMIT-TO (SUBJAREA, "ENGI")) AND (LIMIT-TO (DOCTYPE, "ar")) AND (LIMIT-TO (LANGUAGE, "English"))

### 3. Research C.

Scopus - Document search results

53 document results

KEY ("machine\*" AND "safety" AND "farm\*") AND ( LIMIT-TO ( PUBYEAR , 2019 ) OR LIMIT-TO ( PUBYEAR , 2018 ) OR LIMIT-TO ( PUBYEAR , 2017 ) OR LIMIT-TO ( PUBYEAR , 2016 ) OR LIMIT-TO ( PUBYEAR , 2015 ) OR LIMIT-TO ( PUBYEAR , 2014 ) OR LIMIT-TO ( PUBYEAR , 2013 ) OR LIMIT-TO ( PUBYEAR , 2011 ) OR LIMIT-TO ( PUBYEAR , 2010 ) OR LIMIT-TO ( PUBYEAR , 2009 ) )

Edit Save Set alert Set feed

Search within results...

Refine results

Limit to Exclude

Access type

Open Access (5) >

Other (48) >

Year

2019 (3) >

2018 (13) >

2017 (4) >

2016 (3) >

2015 (7) >

2014 (3) >

2013 (2) >

Documents Secondary documents Patents

Analyze search results Show all abstracts Sort on: Date (newest)

Document title Authors Year Source Cited by

1 Assessment of a ride comfort number for agricultural tractors: A simplified approach Cutini, M., Brambilla, M., Bisaglia, C. 2019 Biosystems Engineering 185, pp. 35-44 1

View abstract View at Publisher Related documents

2 Warning against critical slopes in agriculture: Comprehension of targeted safety signs in a group of machinery operators in Italy Vigoroso, L., Caffaro, F., Cavallo, E. 2019 International Journal of Environmental Research and Public Health 16(4),611 2

View abstract View at Publisher Related documents

3 Conveying safety messages on agricultural machinery: The comprehension of safety pictorials in a group of migrant farmworkers in Italy Bagagiolo, G., Vigoroso, L., Caffaro, F., Cremasco, M.M., Cavallo, E. 2019 International Journal of Environmental Research and Public Health 16(21),4180 0

View abstract View at Publisher Related documents

Scopus - Document search results

15 document results

KEY ("machine\*" AND "safety" AND "farm\*") AND ( LIMIT-TO ( PUBYEAR , 2019 ) OR LIMIT-TO ( PUBYEAR , 2018 ) OR LIMIT-TO ( PUBYEAR , 2017 ) OR LIMIT-TO ( PUBYEAR , 2016 ) OR LIMIT-TO ( PUBYEAR , 2015 ) OR LIMIT-TO ( PUBYEAR , 2014 ) OR LIMIT-TO ( PUBYEAR , 2013 ) OR LIMIT-TO ( PUBYEAR , 2011 ) OR LIMIT-TO ( PUBYEAR , 2010 ) OR LIMIT-TO ( PUBYEAR , 2009 ) ) AND ( LIMIT-TO ( SUBJAREA , "ENGI" ) ) AND ( LIMIT-TO ( DOCTYPE , "ar" ) ) AND ( LIMIT-TO ( LANGUAGE , "English" ) )

Edit Save Set alert Set feed

Search within results...

Refine results

Limit to Exclude

Access type

Other (15) >

Year

2019 (1) >

2018 (2) >

2017 (2) >

2016 (1) >

2015 (2) >

2011 (3) >

2010 (3) >

2009 (1) >

Documents Secondary documents Patents

Analyze search results Show all abstracts Sort on: Date (newest)

Document title Authors Year Source Cited by

1 Assessment of a ride comfort number for agricultural tractors: A simplified approach Cutini, M., Brambilla, M., Bisaglia, C. 2019 Biosystems Engineering 185, pp. 35-44 1

View abstract View at Publisher Related documents

2 Tractor safety and related injuries in Iranian farms Houshyar, E., Houshyar, M. 2018 Safety Science 103, pp. 88-93 1

View abstract View at Publisher Related documents

3 Attentional Control in Accidents Involving Agricultural Tractor Operators Di Nocera, F., Ricciardi, O., Longo, E., (-), Cutini, M., Bisaglia, C. 2018 Ergonomics in Design 26(1), pp. 17-23 0

View abstract View at Publisher Related documents

Search string: KEY ( "machine\*" AND "safety" AND "farm\*" ) AND ( LIMIT-TO ( PUBYEAR , 2020 ) OR LIMIT-TO ( PUBYEAR , 2019 ) OR LIMIT-TO ( PUBYEAR , 2018 ) OR LIMIT-TO ( PUBYEAR , 2017 ) OR LIMIT-TO ( PUBYEAR , 2016 ) OR LIMIT-TO ( PUBYEAR , 2015 ) OR LIMIT-TO ( PUBYEAR , 2014 ) OR LIMIT-TO ( PUBYEAR , 2013 ) OR LIMIT-TO ( PUBYEAR , 2011 ) OR LIMIT-TO ( PUBYEAR , 2010 ) OR LIMIT-TO ( PUBYEAR , 2009 ) ) AND ( LIMIT-TO ( SUBJAREA , "ENGI" ) ) AND ( LIMIT-TO ( DOCTYPE , "ar" ) ) AND ( LIMIT-TO ( LANGUAGE , "English" ) )
